# Supplementary material for: Tension-driven multi-scale self-organisation in human iPSC-derived muscle fibers
Source: eLife. 2022 Aug 3;11:e76649. doi: 10.7554/eLife.76649 (PMC9377800; doi:10.7554/eLife.76649)
Supplement: Figure 5—source data 1. [file elife-76649-fig5-data1.xls]

## Sheet: Figure 5B
Day 3				Day 5					Day 3				Day 5
2.5K	5K	10K	20K	2.5K	5K	10K	20K		2.5K	5K	10K	20K	2.5K	5K	10K	20K
123.028	127.331	151.811	214.734	155.252	195.675	196.667	216.321	Mean	117.01	121.526	144.69	198.779	128.825	161.433	168.898	180.874
104.475	117.729	123.546	148.613	115.613	169.844	162.768	155.979	SD	8.26024	4.55561	20.5728	42.9272	17.2281	24.2591	19.0708	23.2427
116.222	116.203	138.042	263.094	127.213	138.73	158.857	185.053
125.776	123.914	133.377	185.984	134.078	165.533	178.559	164.601
115.549	122.452	176.674	181.472	111.97	137.381	147.64	182.413
Data from 5 technical repeats from 2 biological repeats.

## Sheet: Figure 5E
Day 3				Day 5						Day 3				Day 5
2.5K	5K	10K	20K	2.5K	5K	10K	20K			2.5K	5K	10K	20K	2.5K	5K	10K	20K
0.0630542	0.366117	0.0292362	0.0200353	0.00862412	0.172423	0.103376	0.0278361		Mean	0.015013	0.0425851	0.0261541	0.07364	0.0263393	0.06312	0.124118	0.123148
0.00811366	0.0315891	0.0938632	NA	0.0105768	0.117442	0.112031	0.256751		SD	0.0147966	0.0907488	0.0283234	0.0951533	0.0271737	0.0677816	0.145931	0.0908249
0.0190829	0.00288804	0.00516984	0.166173	0.0070165	0.133338	0.112031	0.0217534
0.00771912	0.0484745	0.0201288	0.0176891	0.0110262	0.0167541	0.577535	0.275067
0.00695501	0.000872197	0.00243704	0.161441	0.0187786	0.185459	0.0166964	0.213225
0.000829627	0.0372211	0.0138992	0.00765112	0.0895166	0.149731	0.174376	0.218069
0.0258071	0.00443869	0.0400689	0.0609264	0.0337856	0.0602735	0.0357663	0.0804972
0.0193905	0.0157241	0.0152577	0.265653	0.0322542	0.00692318	0.0378528	0.0813267
0.0139463	0.0129066	0.0192505	0.0382215	0.010151	0.00246636	0.0232162	0.00855353
0.0117488	0.0276777	0.0881791	0.250761	0.00446464	0.0244804	0.131984	0.145924
0.00268697	0.00138061	0.0183384	0.0180733	0.000598254	0.0162711	0.0583357	0.208053
0.00764737	0.0372148	0.00702477	0.00556406	0.064281	0.0202423	0.0756685	0.109248
0.0142101	0.0294189	0.010339	0.00186354	0.0154087	0.0212574	0.300998	0.112749
0.0128096	0.0111371	0.0266952	0.00372043	0.0176484	0.00358496	0.093426	0.0236006
0.0111933	0.011716	0.00242419	0.0131875	0.0709583	0.0161535	0.0084789	0.0645688
Data from 15 technical repeats from 2 biological repeats.
